# Supplementary material for: Kaposi Sarcoma Incidence and Mortality Rates and Trends in the United States
Source: Research Square preprint supplement (doi:10.21203/rs.3.rs-7181892/v1), 2025-08-01
Supplement: Supplementary file 1 [file 0908e3ebaaaa49eb17182532.docx]

**Table 1.** Mean age-adjusted rates of Kaposi Sarcoma incidence and mortality stratified by sex and age group.

|  | Female (95% CI) | Male (95% CI) |  | Age 15–64 years (95% CI) | Age ≥65 years (95% CI) |
| --- | --- | --- | --- | --- | --- |
| Age-adjusted incidence rate per 100,000 | | | | | |
| All | 0.10 (0.10 - 0.11) | 0.99 (0.98 - 1.00) | White men | 0.70 (0.69 - 0.72) | 1.26 (1.22 - 1.30) |
| White | 0.08 (0.07 - 0.08) | 0.79 (0.78 - 0.81) | Black men | 2.39 (2.33 - 2.45) | 1.41 (1.28 - 1.56) |
| Black | 0.24 (0.22 - 0.26) | 2.23 (2.18 - 2.29) | White women | 0.02 (0.02 - 0.03) | 0.36 (0.35 - 0.38) |
| Asian or Pacific Islander | 0.04 (0.03-0.05) | 0.42 (0.39-0.46) | Black women | 0.22 (0.20 - 0.23) | 0.36 (0.31 - 0.42) |
| American Indian or Alaska Native | Suppressed | 0.55 (0.46-0.65) | Asian or Pacific Islander men | 0.34 (0.31-0.37) | 0.85 (0.70-1.02) |
| Age 15–64 years | 0.05 (0.05 - 0.05) | 0.93 (0.92 - 0.94) | Asian or Pacific Islander women | 0.01 (0.01-0.02) | 0.19 (0.13-0.26) |
| Age ≥65 years | 0.37 (0.35 - 0.39) | 1.30 (1.26 - 1.33) | American Indian or Alaska Native men | 0.53 (0.44-0.62) | 0.68 (0.38-1.15) |
|  |  |  | American Indian or Alaska Native women | Suppressed | Suppressed |
| Age-adjusted mortality rate per 100,000 | | | | | |
| All | 0.01 (0.01 - 0.01) | 0.16 (0.16 - 0.17) | White men | 0.10 (0.10 - 0.11) | 0.26 (0.24 - 0.28) |
| White | 0.01 (0.01 - 0.02) | 0.13 (0.12 - 0.13) | Black men | 0.43 (0.40 - 0.45) | 0.28 (0.23 - 0.35) |
| Black | 0.03 (0.02 - 0.04) | 0.40 (0.38 - 0.43) | White women | 0.00 (0.00 - 0.00) | 0.08 (0.08 - 0.09) |
| Asian or Pacific Islander | Unreliable | 0.05 (0.04-0.07) | Black women | 0.02 (0.02 - 0.03) | 0.06 (0.04 - 0.09) |
| American Indian or Alaska Native | Suppressed | 0.10 (0.06-0.16) | Asian or Pacific Islander men | 0.03 (0.02-0.05) | 0.16 (0.10-0.25) |
| Age 15–64 years | 0.00 (0.00 - 0.00) | 0.14 (0.14 - 0.15) | Asian or Pacific Islander women | Suppressed | Suppressed |
| Age ≥65 years | 0.08 (0.08 - 0.09) | 0.25 (0.23 - 0.26) | American Indian or Alaska Native men | Unreliable | Suppressed |
|  |  |  | American Indian or Alaska Native women | Suppressed | Suppressed |

*Suppressed: count <10; Unreliable: count 10–19 per CDC WONDER definitions
